# Supplementary material
Source: PubMed Central journal article supplement (PMC4689400)

## Supporting Information

### Regiocontrol in Catalytic Reductive Couplings through Alterations of Silane Rate Dependence

Evan P. Jackson and John Montgomery\*

Department of Chemistry, University of Michigan, Ann Arbor, MI 48109-1055

jmontg@umich.edu

All reactions were conducted in flame-dried or oven dried (120 °C) glassware with magnetic stirring under an atmosphere of dry nitrogen. Solvents were purified under nitrogen using a solvent purification system (Innovative Technology, Inc. Model # SPS-400-3 and PS-400-3). Unless otherwise noted, alkynes were used as received. Aldehydes were distilled prior to use. Et<sub>3</sub>SiH, *i*-Pr<sub>3</sub>SiH (Aldrich) and *t*-Bu<sub>2</sub>MeSiH (\$82/10 g, Gelest & Chem-Impex) were passed through basic alumina before use and stored under nitrogen. Ni(COD)<sub>2</sub> (Strem Chemicals, Inc), *N*-heterocyclic carbene salts (Sigma Aldrich, Strem), and *t*-BuOK (Strem) were stored and weighed in an inert atmosphere glovebox.

<sup>1</sup>H and <sup>13</sup>C were obtained in CDCl<sub>3</sub> at rt on a Varian Unity 500 MHz or Varian Unity 700 MHz instrument. Chemical shifts of <sup>1</sup>H NMR spectra were recorded in parts per million (ppm) on the δ scale from an internal standard of residual chloroform (7.24 ppm). Chemical shifts of <sup>13</sup>C NMR spectra were recorded in ppm from the central peak of CDCl<sub>3</sub> (77.0 ppm) on the δ scale. High resolution mass spectra (HRMS) were obtained at the University of Michigan Mass Spectrometry Laboratory on a VG-70-250-s spectrometer manufactured by Micromass Corp. (Manchester UK). Regioisomeric ratios were determined on crude reaction mixtures using either <sup>1</sup>H NMR or GC. GCMS analysis was carried out on a HP 6980 Series GC system with HP-5MS column (30 m x 0.250 mm x 0.25 μm). GCFID analysis was carried out on a HP 6980N Series GC system with a HP-5 column (30 m x 0.32 mm x 0.25 μm).

**General Procedure A for Ni(COD)<sub>2</sub>/SIPr Promoted Reductive Coupling of Internal Alkynes, Aldehydes and Triisopropylsilane:**

2 mL of THF was added to a solid mixture of Ni(COD)<sub>2</sub> (0.06 mmol), SIPr•HCl salt (0.05 mmol), and *t*-BuOK (0.05 mmol). The resulting solution was stirred for 5 min at rt until the solution turned dark brown. The alkyne (0.5 mmol), aldehyde (0.5 mmol), and triisopropylsilane (1.0 mmol) were combined together with 2 mL of THF. The catalyst was immersed in a 50 °C oil bath and the mixture of aldehyde, alkyne, and silane was added over the course of 60 minutes using a syringe pump. The reaction mixture was allowed to stir until starting materials were consumed. The reaction mixture was filtered through silica gel eluting with 50 % v/v EtOAc/hexanes. The solvent was removed *in vacuo*, and the crude residue was purified via flash chromatography on silica gel to afford the desired product.

**General Procedure B for Ni(COD)<sub>2</sub>/SIPr Promoted Reductive Coupling of Terminal Alkynes, Aldehydes and Di-*tert*-butyl(methyl)silane:**

38 mL of THF was added to a solid mixture of Ni(COD)<sub>2</sub> (0.11mmol), SIPr•HCl salt (0.1 mmol), and *t*-BuOK (0.1 mmol). The resulting solution was stirred for 10 min at rt until the solution turned light brown. The alkyne (1.2 equiv, 0.6 mmol), aldehyde (1.0 equiv, 0.5 mmol), and di-*tert*-butyl(methyl)silane (2.0 equiv, 1 mmol) were combined together with 2 mL of THF and the mixture was added over the course of 60 minutes using a syringe pump at rt. The reaction mixture was allowed to stir until starting materials were consumed. The reaction mixture was filtered through silica gel eluting with 50 % v/v EtOAc/hexanes. The solvent was removed *in vacuo*, and the crude residue was purified via flash chromatography on silica gel to afford the desired product.

In cases where duplicate products were reported in more than one table, the compound characterization is provided for the optimized Table 4 procedure.

**(E)-((1,2-diphenylbut-2-en-1-yl)oxy)triisopropylsilane**

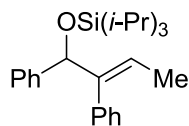

**Table 4, Entry 1:** Following a modified procedure B, Ni(COD)<sub>2</sub> (16.5 mg, 0.06 mmol), SiPr·HCl salt (21.3 mg, 0.05 mmol), and *t*-BuOK (5.6 mg, 0.05 mmol) were dissolved in 38 mL THF. Triisopropylsilane (158 mg, 1 mmol), prop-1-yn-1-ylbenzene (58 mg, 0.5 mmol), benzaldehyde (53 mg, 0.5 mmol) were combined with 2 mL THF and added to the reaction over 1 hour. This gave a crude residue which was purified via flash chromatography (100 % hexanes) to afford a single regioisomer in a >98:2 isolated regioselectivity (>98:2 crude regioselectivity) (157 mg, 0.41 mmol, 82 % yield).

Spectra data as previously reported<sup>1</sup>

**(E)-((1-(4-fluorophenyl)-2-phenylbut-2-en-1-yl)oxy)triisopropylsilane.**

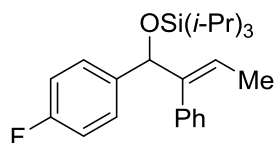

**Table 4, Entry 2:** Following Procedure A, Ni(COD)<sub>2</sub> (16.5 mg, 0.06 mmol), SiPr·HCl salt (21.3 mg, 0.05 mmol), *t*-BuOK (5.6 mg, 0.05 mmol), triisopropylsilane (158 mg, 1 mmol), prop-1-yn-1-ylbenzene (58 mg, 0.5 mmol), 4-fluorobenzaldehyde (62 mg, 0.5 mmol) gave a crude residue which was purified via flash chromatography (100 % hexanes) to afford a single regioisomer in a >98:2 isolated regioselectivity (93:7 crude regioselectivity) (169 mg, 0.43 mmol, 85 % yield).

<sup>1</sup>H NMR (700 MHz, CDCl<sub>3</sub>) δ 7.18-7.14 (m, 3H), 7.04-7.00 (m, 2H), 6.84-6.80 (m, 2H), 6.79-6.76 (m, 2H), 6.03 (qd, *J* = 7.0 Hz, 0.7 Hz, 1H), 5.36 (s, 1H), 1.49 (dd, *J* = 7.0 Hz, 0.7 Hz, 3H), 1.13-1.07 (m, 3H), 1.02 (d, *J* = 7.0 Hz, 9H), 0.97 (d, *J* = 7.7 Hz, 9H)

<sup>13</sup>C NMR (175 MHz, CDCl<sub>3</sub>): δ 161.6 (d, *J* = 242.6 Hz), 144.7, 139.5 (d, *J* = 2.8 Hz), 138.0, 129.6, 128.0 (d, *J* = 8.1 Hz), 127.5, 126.5, 121.2, 114.3 (d, *J* = 21.0 Hz), 78.7, 18.02, 17.95, 14.1, 12.3

IR (film, cm<sup>-1</sup>): 2943, 2865, 1602, 1506, 1463

HRMS (EI) (*m/z*): [M-<sup>i</sup>Pr]<sup>+</sup> calcd for C<sub>22</sub>H<sub>28</sub>FOSi 355.1893; found 355.1888

**(E)-triisopropyl((3-phenylundec-2-en-4-yl)oxy)silane. Major Regioisomer**

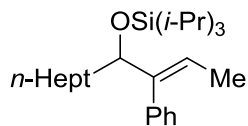

**Table 3, Entry 3:** Following Procedure A, Ni(COD)<sub>2</sub> (16.5 mg, 0.06 mmol), SiPr·HCl salt (21.3 mg, 0.05 mmol), *t*-BuOK (5.6 mg, 0.05 mmol), triisopropylsilane (158 mg, 1 mmol), prop-1-yn-1-ylbenzene (58 mg, 0.5 mmol), octanal (64 mg, 0.5 mmol) gave a crude residue which was purified via flash chromatography (100 % hexanes) to afford a single regioisomer in a >98:2 isolated regioselectivity (>98:2 crude regioselectivity) (156 mg, 0.39 mmol, 77 % yield).

<sup>1</sup>H NMR (500 MHz, CDCl<sub>3</sub>) δ 7.32-7.28 (m, 2H), 7.24-7.20 (m, 1H), 7.18-7.12 (m, 2H), 5.76 (q, *J* = 7.0 Hz, 1H), 4.45 (t, *J* = 5.0 Hz, 1H), 1.54 (d, *J* = 7.0 Hz, 3H), 1.43-1.04 (m, 33H), 0.84 (t, *J* = 7.0 Hz, 3 H)

<sup>13</sup>C NMR (125 MHz, CDCl<sub>3</sub>): δ 143.2, 138.9, 129.3, 127.8, 126.4, 122.6, 77.3 35.7, 31.8, 29.6, 29.2, 23.9, 22.6, 18.20, 18.18, 14.13, 14.08, 12.5

IR (film, cm<sup>-1</sup>): 2925, 2864, 1493, 1463, 1382

HRMS (EI) (*m/z*): [M-<sup>i</sup>Pr]<sup>+</sup> calcd for C<sub>23</sub>H<sub>39</sub>OSi 359.2770; found 359.2772

**(E)-((1-cyclohexyl-2-phenylbut-2-en-1-yl)oxy)triisopropylsilane.**

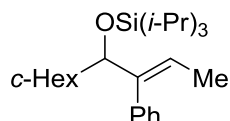

**Table 4, Entry 4:** Following Procedure A, Ni(COD)<sub>2</sub> (16.5 mg, 0.06 mmol), SiPr·HCl salt (21.3 mg, 0.05 mmol), *t*-BuOK (5.6 mg, 0.05 mmol), triisopropylsilane (158 mg, 1 mmol), prop-1-yn-1-ylbenzene (58 mg, 0.5 mmol), cyclohexanecarbaldehyde (56 mg, 0.5 mmol) gave a crude residue which was purified via flash chromatography (100 % hexanes) to afford a single regioisomer in a >98:2 isolated regioselectivity (>98:2 crude regioselectivity) (174 mg, 0.45 mmol, 90 % yield).

<sup>1</sup>H NMR (500 MHz, CDCl<sub>3</sub>) δ 7.32-7.28 (m, 2H), 7.24-7.18 (m, 3H), 5.74 (q, *J* = 7.0 Hz, 1H), 4.30 (d, *J* = 4.5 Hz, 1H), 1.70-1.47 (m, 8H), 1.25-0.86 (m, 27 H)

<sup>13</sup>C NMR (175 MHz, CDCl<sub>3</sub>): δ 142.2, 139.5, 129.3, 127.8, 126.4, 123.1, 81.6, 42.5, 30.0, 27.2, 26.7, 26.5, 26.4, 18.4, 18.3, 14.2, 12.9

IR (film, cm<sup>-1</sup>): 2924, 2864, 1492, 1449, 1387

HRMS (EI) (*m/z*): [M]<sup>+</sup> calcd for C<sub>25</sub>H<sub>42</sub>OSi 386.3005; found 386.2996

**(E)-((2-isobutyl-1-phenylpent-2-en-1-yl)oxy)triisopropylsilane** Major Regioisomer

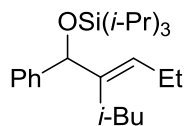

**(E)-((2-ethyl-5-methyl-1-phenylhex-2-en-1-yl)oxy)triisopropylsilane** Minor regioisomer

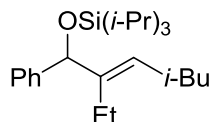

**Table 4, Entry 5:** Following Procedure A, Ni(COD)<sub>2</sub> (16.5 mg, 0.06 mmol), SIPr·HCl salt (21.3 mg, 0.05 mmol), *t*-BuOK (5.6 mg, 0.05 mmol), triisopropylsilane (158 mg, 1 mmol), 6-methylhept-3-yne (55 mg, 0.5 mmol), benzaldehyde (53 mg, 0.5 mmol) gave a crude residue which was purified via flash chromatography (100 % hexanes) to afford a mixture of regioisomers in a 95:5 regioselectivity (94:6 crude regioselectivity) (161 mg, 0.43 mmol, 86 % yield).

<sup>1</sup>H NMR (700 MHz, CDCl<sub>3</sub>) δ 7.33-7.30 (m, 2 H), 7.26-7.22 (m, 2 H), 7.19-7.15 (m, 1 H), 5.79 (t, *J* = 7 Hz, 1 H), 5.14 (s, 1 H), 2.09-1.99 (m, 2 H), 1.78 (dd, *J* = 14, 8.4 Hz, 1 H), 1.66 (dd, *J* = 14 Hz, 6.3 Hz, 1 H), 1.57-1.51 (m, 1 H), 1.1-1.03 (m, 3 H), 1.02-0.94 (m, 21 H), 0.75 (d, *J* = 6.3 Hz, 3 H), 0.72 (d, *J* = 6.3 Hz, 3 H)

<sup>13</sup>C NMR (175 MHz, CDCl<sub>3</sub>): δ 144.8, 139.6, 128.3, 127.6, 126.6, 126.5, 78.9, 36.1, 27.4, 23.2, 22.3, 21.2, 18.04, 17.97, 14.3, 12.3

IR (film, cm<sup>-1</sup>): 2945, 2866, 1463

HRMS (EI) (*m/z*): [M]<sup>+</sup> calcd for C<sub>24</sub>H<sub>42</sub>OSi 374.3005; found 374.2991

Characteristic <sup>1</sup>H NMR of minor isomer: 5.64 (t, *J* = 7.7 Hz, 1 H), 5.17 (s, 1 H)

**(E)-((4-isobutyldodec-3-en-5-yl)oxy)triisopropylsilane** Major regioisomer

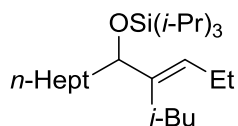

**(E)-((5-ethyl-2-methyltridec-4-en-6-yl)oxy)triisopropylsilane** Minor regioisomer

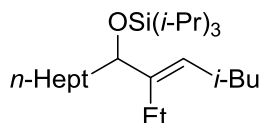

**Table 4, Entry 6:** Following Procedure A, Ni(COD)<sub>2</sub> (16.5 mg, 0.06 mmol), SIPr·HCl salt (21.3 mg, 0.05 mmol), *t*-BuOK (5.6 mg, 0.05 mmol), triisopropylsilane (158 mg, 1 mmol), 6-methylhept-3-yne (55 mg, 0.5 mmol), octanal (64 mg, 0.5 mmol) gave a crude residue which was purified via flash chromatography

(100 % hexanes) to afford a mixture of regioisomers in 94:6 regioselectivity (96:4 crude regioselectivity) (132 mg, 0.33 mmol, 66 % yield).

**<sup>1</sup>H NMR (700 MHz, CDCl<sub>3</sub>)** δ 5.40 (t, *J* = 7.0 Hz, 1 H), 4.13 (t, *J* = 4.0 Hz, 1 H), 2.07-1.97 (m, 2 H), 1.89 (dd, *J* = 14.0, 8.4 Hz, 1 H), 1.84 (dd, *J* = 14.0, 6.3 Hz, 1 H), 1.80-1.74 (m, 1 H), 1.62-1.46 (m, 2 H), 1.31-1.10 (m, 10 H), 1.08-1.00 (m, 21 H), 0.91 (t, *J* = 7 Hz, 3 H), 0.87 (d, *J* = 6.3 Hz, 3 H), 0.85 (t, *J* = 7.0 Hz, 3 H), 0.84 (d, *J* = 7 Hz, 3 H)

**<sup>13</sup>C NMR (125 MHz, CDCl<sub>3</sub>)**: δ 138.3, 129.3, 76.96, 36.6, 36.5, 31.8, 29.7, 29.3, 27.8, 24.5, 23.3, 22.7, 22.6, 21.2, 18.17, 18.15, 14.3, 14.1, 12.5

**IR (film, cm<sup>-1</sup>)**: 2926, 2865, 1463

**HRMS (EI) (*m/z*)**: [M-iPr]<sup>+</sup> calcd for C<sub>22</sub>H<sub>45</sub>OSi 353.3240; found 353.3233

**Characteristic <sup>1</sup>H NMR of minor isomer**: 5.24 (t, *J* = 7.7 Hz, 1 H), 4.09 (t, *J* = 6.3 Hz, 1 H)

**(E)-1-phenyl-2-propylpent-2-en-1-ol** Major regioisomer

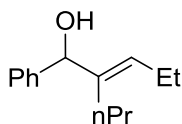

**(E)-2-ethyl-1-phenylhex-2-en-1-ol** Minor regioisomer

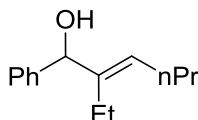

**Table 4, Entry 7**: Following Procedure A, Ni(COD)<sub>2</sub> (16.5 mg, 0.06 mmol), SiPr·HCl salt (21.3 mg, 0.05 mmol), *t*-BuOK (5.6 mg, 0.05 mmol), triisopropylsilane (158 mg, 1 mmol), hept-3-yne (48 mg, 0.5 mmol), benzaldehyde (53 mg, 0.5 mmol) gave a crude residue which was purified via flash chromatography (100 % hexanes) to afford a mixture of regioisomers in a 68:32 regioselectivity (68:32 crude regioselectivity). The product was subjected to tetra-*n*-butylammonium fluoride deprotection for characterization purposes. (57 mg, 0.28 mmol, 56 % yield). Spectral data is provided for the mixture of regioisomers.

**<sup>1</sup>H NMR (700 MHz, CDCl<sub>3</sub>)**: 7.36-7.33 (m, 2.8 H), 7.32-7.29 (m, 2.9 H), 7.25-7.24 (m, 0.6 H), 7.23-7.22 (m, 0.3 H), 5.59 (t, *J* = 7 Hz, 1 H), 5.58 (t, *J* = 7 Hz, 0.44 H), 5.15 (d, *J* = 2.1 Hz, 0.47 H), 5.13 (d, *J* = 2.1 Hz, 1 H), 2.11-2.03 (m, 3 H), 2.00 (dd, *J* = 14, 7.7 Hz, 0.5 H), 1.98-1.93 (m, 1.16 H), 1.91-1.85 (m, 0.56 H), 1.84-1.79 (m 1.1 H), 1.75 (br s, 1.35 H), 1.42 (sex, 7.7 Hz, 1 H), 1.30-1.23 (m, 1.32 H), 1.22-1.15 (m, 1.15 H), 0.995 (t = 7.7 Hz, 3 H), 0.92 (t, *J* = 7.7 Hz, 1.65 H), 0.82 (t, *J* = 7.7 Hz, 1.65 H), 0.80 (t, *J* = 7 Hz, 3 H)

**<sup>13</sup>C NMR (175 MHz, CDCl<sub>3</sub>)**: 142.79, 142.78, 142.75, 140.6, 129.1, 128.2, 127.3, 127.3, 126.8, 126.54, 126.53, 78.2, 78.1, 29.9, 29.5, 22.9, 22.8, 21.0, 20.6, 14.41, 14.36, 14.15, 13.95

**IR (film, cm<sup>-1</sup>)**: 3362, 2958, 2930, 2869, 1492, 1451

**HRMS (EI) ( $m/z$ ):** calcd for  $C_{14}H_{20}O$  204.1514; found 204.1516

**(E)-((2-ethylidene-1-(furan-2-yl)pentyl)oxy)triisopropylsilane** Major regioisomer

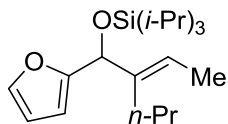

**(E)-((1-(furan-2-yl)-2-methylhex-2-en-1-yl)oxy)triisopropylsilane** Minor regioisomer

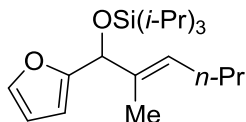

**Table 4, Entry 8:** Following Procedure A,  $Ni(COD)_2$  (16.5 mg, 0.06 mmol),  $SiPr \cdot HCl$  salt (21.3 mg, 0.05 mmol),  $tBuOK$  (5.6 mg, 0.1 mmol), triisopropylsilane (158 mg, 1 mmol), 2-hexyne (41 mg, 0.5 mmol), 2-furancarboxaldehyde (48 mg, 0.5 mmol) gave a crude residue which was purified via flash chromatography (100 % hexanes) to afford a mixture of regioisomers in 92:8 regioselectivity (93:7 crude regioselectivity) (128 mg, 0.38 mmol, 76 % yield).

$^1H$  NMR (700 MHz,  $CDCl_3$ )  $\delta$  7.28 (dd,  $J = 1.4, 0.7$  Hz, 1 H), 6.27 (dd,  $J = 3.5, 1.4$  Hz, 1 H), 6.19-6.18 (m, 1 H), 5.73 (q,  $J = 7.0$  Hz, 1 H), 5.14 (s, 1H), 1.97 (ddd,  $J = 13.3, 10.5, 6.3$  Hz, 1 H), 1.87 (ddd,  $J = 13.7, 10.5, 5.6$ , 1 H) (m, 1 H), 1.64 (d,  $J = 7.0$  Hz, 3H), 1.22-1.16 (m, 1 H), 1.13-1.03 (m, 4H), 1.01 (d,  $J = 7.7$  Hz, 9H), 0.99 (d,  $J = 7.0$  Hz, 9 H), 0.80 (t,  $J = 7.0$  Hz, 3 Hz)

$^{13}C$  NMR (175 MHz,  $CDCl_3$ ):  $\delta$  156.9, 141.0, 140.4, 121.2, 110.0, 105.9, 73.3, 29.1, 21.9, 18.0, 17.9, 14.5, 13.1, 12.3

**IR (film,  $cm^{-1}$ ):** 2943, 2866, 1464

**HRMS (ESI+) ( $m/z$ ):**  $[M+H]^+$  calcd for  $C_{20}H_{40}O_2Si$  337.2557; found 337.2549

**Characteristic  $^1H$  NMR of minor isomer:** 5.58 (t,  $J = 7$  Hz, 1 H), 5.13 (s, 1 H), 0.89 (t,  $J = 7.0$  Hz, 3 H)

**(E)-triisopropyl((2-isopropyl-1-phenylbut-2-en-1-yl)oxy)silane**

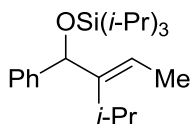

**Table 4, Entry 9:** Following Procedure A,  $Ni(COD)_2$  (16.5 mg, 0.06 mmol),  $SiPr \cdot HCl$  salt (21.3 mg, 0.05 mmol),  $t-BuOK$  (5.6 mg, 0.05 mmol), triisopropylsilane (158 mg, 1 mmol), 4-methylpent-2-yne (41 mg, 0.5 mmol), benzaldehyde (53 mg, 0.5 mmol) gave a crude residue which was purified via flash chromatography (100 % hexanes) to afford a single regioisomer in a >98:2 isolated regioselectivity (>98:2 crude regioselectivity) (135 mg, 0.39 mmol, 78 % yield).

Spectral data as previously reported<sup>1</sup>

**(E)-((1-cyclohexyl-2-isopropylbut-2-en-1-yl)oxy)triisopropylsilane**

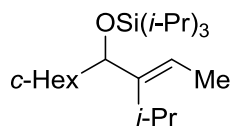

**Table 4, Entry 10:** Following Procedure A, Ni(COD)<sub>2</sub> (16.5 mg, 0.06 mmol), SiPr·HCl salt (21.3 mg, 0.05 mmol), *t*-BuOK (5.6 mg, 0.05 mmol), triisopropylsilane (158 mg, 1 mmol), 4-methylpent-2-yne (41 mg, 0.5 mmol), cyclohexanecarbaldehyde (56 mg, 0.5 mmol) gave a crude residue which was purified via flash chromatography (100 % hexanes) to afford a single regioisomer in a >98:2 isolated regioselectivity (>98:2 crude regioselectivity) (133 mg, 0.38 mmol, 75 % yield).

<sup>1</sup>H NMR (500 MHz, CDCl<sub>3</sub>) δ 5.31 (q, *J* = 7 Hz, 1H), 3.93 (d, *J* = 5 Hz, 1 H), 2.46 (sept, *J* = 7 Hz, 1H), 1.75-1.68 (m, 3H), 1.66 (d, *J* = 7.0 Hz), 1.64-1.57 (m, 2H), 1.34-0.88 (m, 33H)

<sup>13</sup>C NMR (125 MHz, CDCl<sub>3</sub>): δ 144.8, 120.3, 81.3, 42.9, 31.0, 28.0, 26.81, 26.78, 26.6, 21.4, 21.2, 18.4, 18.3, 13.5, 13.0

IR (film, cm<sup>-1</sup>): 2925, 2865, 1464

HRMS (EI) (*m/z*): [M]<sup>+</sup> calcd for C<sub>22</sub>H<sub>44</sub>OSi 352.3161; found 352.3151

**Di-*tert*-butyl(methyl)(3-methyl-2-methylene-1-phenylbutoxy)silane**

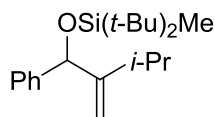

**Table 4, Entry 11:** Following Procedure B, Ni(COD)<sub>2</sub> (30.2 mg, 0.11 mmol), SiPr·HCl salt (42.6 mg, 0.1 mmol), *t*-BuOK (11.2 mg, 0.1 mmol), Di-*t*-butylmethylsilane (158 mg, 1 mmol), 3-methylbut-1-yne (41 mg, 0.6 mmol), benzaldehyde (53 mg, 0.5 mmol) gave a crude residue which was purified via flash chromatography (100 % hexanes) to afford a single regioisomer in a >98:2 isolated regioselectivity (>98:2 crude regioselectivity) (101 mg, 0.30 mmol, 61 % yield).

<sup>1</sup>H NMR (700 MHz, CDCl<sub>3</sub>) δ 7.32-7.30 (m, 2H), 7.27-7.24 (m, 2H), 7.20-7.17 (m, 1 H), 5.38 (s, 1 H), 5.16 (s, 1 H), 4.9 (s, 1 H), 2.04 (sept, *J* = 7.0 Hz, 1 H), 0.99 (s, 9 H), 0.89 (d, *J* = 7.0 Hz, 3 H), 0.84 (s, 9 H), 0.83 (d, *J* = 7 Hz, 3 H), -0.04 (s, 3 H)

<sup>13</sup>C NMR (175 MHz, CDCl<sub>3</sub>): δ 158.2, 143.6, 127.8, 126.98, 126.97, 106.6, 78.4, 28.8, 27.8, 27.6, 23.7, 22.3, 21.1, 20.5, -8.6

IR (film, cm<sup>-1</sup>): 2960, 2857, 1471

HRMS (EI) (*m/z*): [M-<sup>t</sup>Bu]<sup>+</sup> calcd for C<sub>17</sub>H<sub>27</sub>OSi 275.1813; found 275.1833



**Di-tert-butyl(methyl)((2-methylene-1-phenyloctyl)oxy)silane**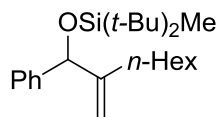

**Table 4, Entry 12:** Following Procedure B, Ni(COD)<sub>2</sub> (30.2 mg, 0.11 mmol), SIPr·HCl salt (42.6 mg, 0.1 mmol), *t*-BuOK (11.2 mg, 0.1 mmol), Di-*t*-butylmethylsilane (158 mg, 1 mmol), 1-octyne (66 mg, 0.6 mmol), benzaldehyde (53 mg, 0.5 mmol) gave a crude residue which was purified via flash chromatography (100 % hexanes) to give a mixture of regioisomers in 95:5 isolated regioselectivity (95:5 crude regioselectivity) (121 mg, 0.32 mmol, 65 % yield) Major (115 mg, 0.31 mmol), Minor (6 mg, 0.016 mmol)

<sup>1</sup>H NMR (700 MHz, CDCl<sub>3</sub>) δ 7.33-7.31 (m, 2 H), 7.28 (t, *J* = 7.7 Hz, 2 H), 7.21-7.18 (m, 1 H), 5.29 (s, 1 H), 5.15 (s, 1 H), 4.82 (d, *J* = 1.4 Hz, 1 H), 1.91 (dt, *J* = 16.1, 7.7 Hz, 1 H), 1.70 (dt, *J* = 16.1, 7.7 Hz, 1 H), 1.32-1.26 (m, 2 H), 1.26-1.13 (m, 6 H), 1.00 (s, 9 H), 0.87 (s, 9 H), 0.82 (t, *J* = 7 Hz, 3 H), -0.01 (s, 3 H)

<sup>13</sup>C NMR (175 MHz, CDCl<sub>3</sub>): δ 151.9, 143.6, 127.8, 126.8, 126.5, 108.8, 79.3, 31.7, 30.3, 29.1, 27.8, 27.7, 27.5, 22.5, 20.9, 20.7, 14.0, -8.7

IR (film, cm<sup>-1</sup>): 2930, 2856, 1471

HRMS (EI) (*m/z*): [M-<sup>t</sup>Bu]<sup>+</sup> calcd for C<sub>20</sub>H<sub>33</sub>OSi 317.2301; found 317.2305

**(E)-di-tert-butyl(methyl)((1-phenylnon-2-en-1-yl)oxy)silane**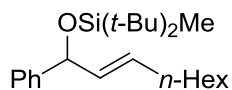

Spectral data as previously reported<sup>1</sup>

## Kinetics experiments

Following a modified method A, Ni(COD)<sub>2</sub> (16.5 mg, 0.06 mmol), SIPr·HCl salt (21.3 mg, 0.05 mmol), and *t*-BuOK (5.6 mg, 0.05 mmol) were dissolved in 38 mL THF. The mixture was stirred for approximately 15 min until the solution turned light brown. Triisopropylsilane (2, 3, 4, 6 equiv), prop-1-yn-1-ylbenzene (58 mg, 0.5 mmol), benzaldehyde (53 mg, 0.5 mmol), and octadecane (95 mg, 0.0375 mmol) were combined with THF to a total volume of 2 mL. This mixture was injected into the reaction as quickly as possible. Reaction aliquots (1.0 mL) were taken every 10 seconds, diluted in CH<sub>2</sub>Cl<sub>2</sub> (0.8 mL), and shaken. Aliquots were then filtered through a pipette of silica gel. Samples were analyzed by GCFID and product concentration was determined using a calibration curve. The first 6 data points were used for initial rates.

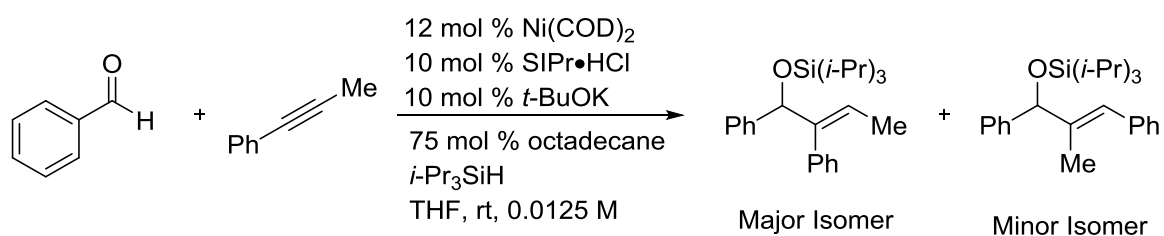

Example plot of reaction progression for both regioisomers using 2 equiv *i*-Pr<sub>3</sub>SiH

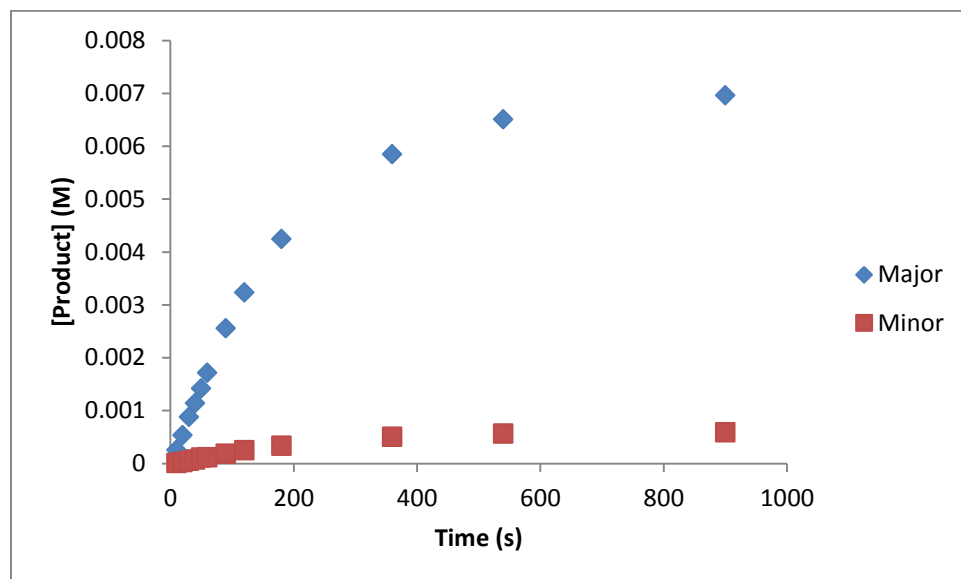

Initial rates of Major regioisomer

| Equip Silane | $\Delta[\text{Major}]/\Delta t$ (M/Sec)* $10^{-5}$ | Avg. $\Delta[\text{Major}]/\Delta t$ | Std. Dev. |
|--------------|----------------------------------------------------|--------------------------------------|-----------|
| 2            | 2.87                                               | 2.71                                 | 0.22      |
|              | 2.48                                               |                                      |           |
|              | 2.91                                               |                                      |           |
|              | 2.56                                               |                                      |           |
| 3            | 2.60                                               | 3.21                                 | 0.46      |
|              | 3.11                                               |                                      |           |
|              | 3.61                                               |                                      |           |
|              | 3.51                                               |                                      |           |
| 4            | 3.44                                               | 3.03                                 | 0.56      |
|              | 2.47                                               |                                      |           |
|              | 2.64                                               |                                      |           |
|              | 3.57                                               |                                      |           |
| 6            | 3.51                                               | 3.21                                 | 0.90      |
|              | 4.33                                               |                                      |           |
|              | 2.67                                               |                                      |           |
|              | 2.32                                               |                                      |           |

Initial rates of Minor regioisomer

| Equip Silane | $\Delta[\text{Minor}]/\Delta t$ (M/Sec)* $10^{-5}$ | Avg. $\Delta[\text{Minor}]/\Delta t$ | Std. Dev. |
|--------------|----------------------------------------------------|--------------------------------------|-----------|
| 2            | 0.206                                              | 0.207                                | 0.016     |
|              | 0.202                                              |                                      |           |
|              | 0.228                                              |                                      |           |
|              | 0.190                                              |                                      |           |
| 3            | 0.251                                              | 0.332                                | 0.058     |
|              | 0.329                                              |                                      |           |
|              | 0.373                                              |                                      |           |
|              | 0.374                                              |                                      |           |
| 4            | 0.457                                              | 0.405                                | 0.058     |
|              | 0.352                                              |                                      |           |
|              | 0.359                                              |                                      |           |
|              | 0.453                                              |                                      |           |
| 6            | 0.638                                              | 0.582                                | 0.156     |
|              | 0.777                                              |                                      |           |
|              | 0.473                                              |                                      |           |
|              | 0.441                                              |                                      |           |

2 equiv *i*-Pr<sub>3</sub>SiH

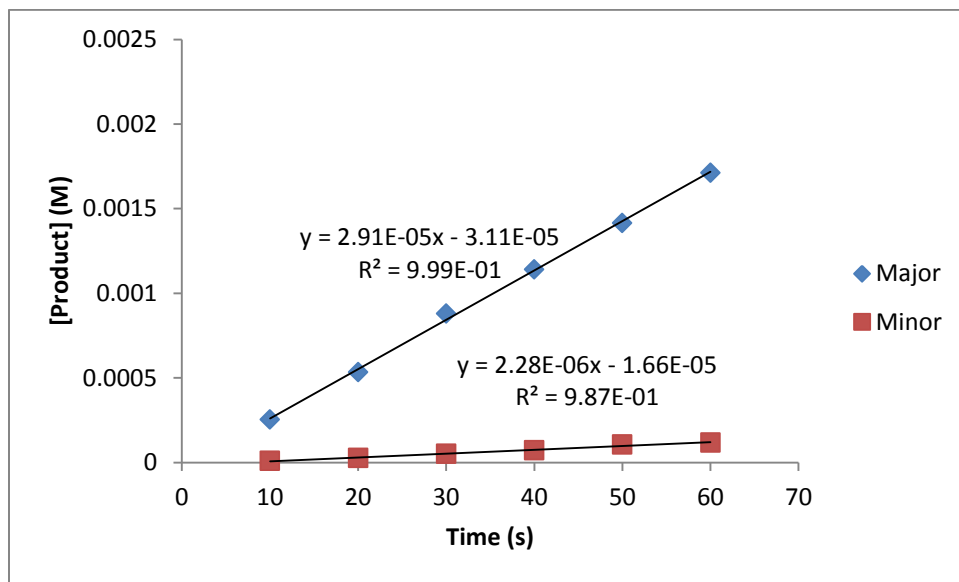

3 equiv *i*-Pr<sub>3</sub>SiH

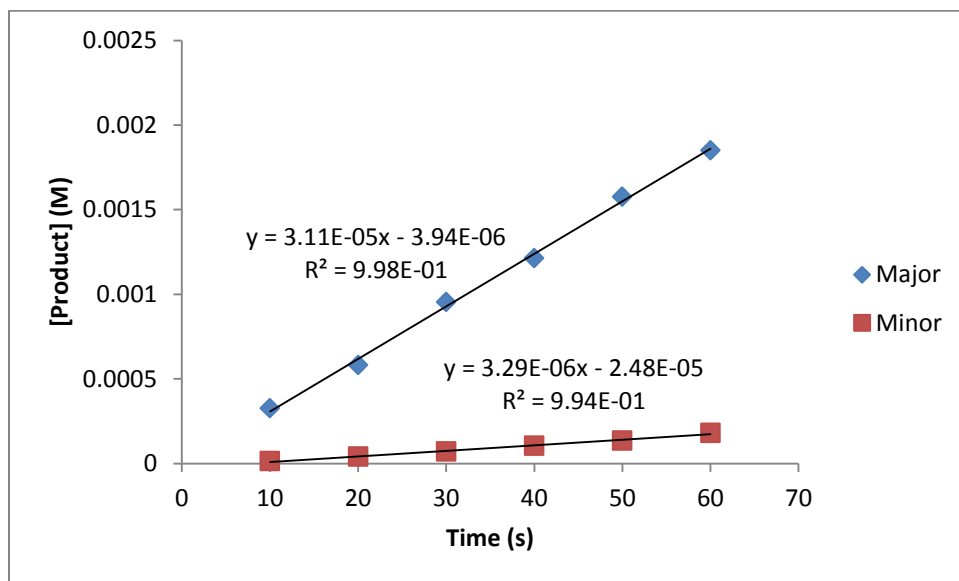

4 equiv *i*-Pr<sub>3</sub>SiH

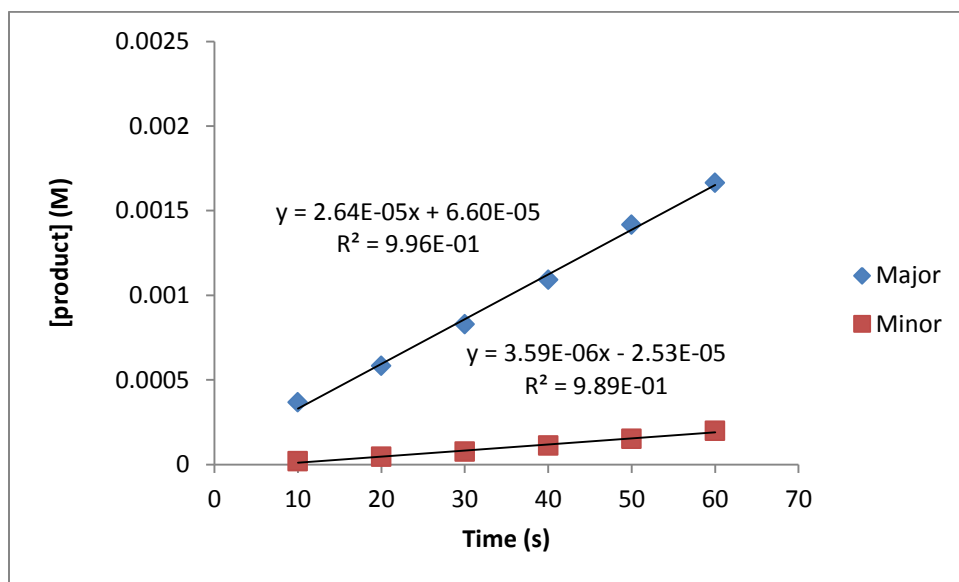

6 equiv *i*-Pr<sub>3</sub>SiH

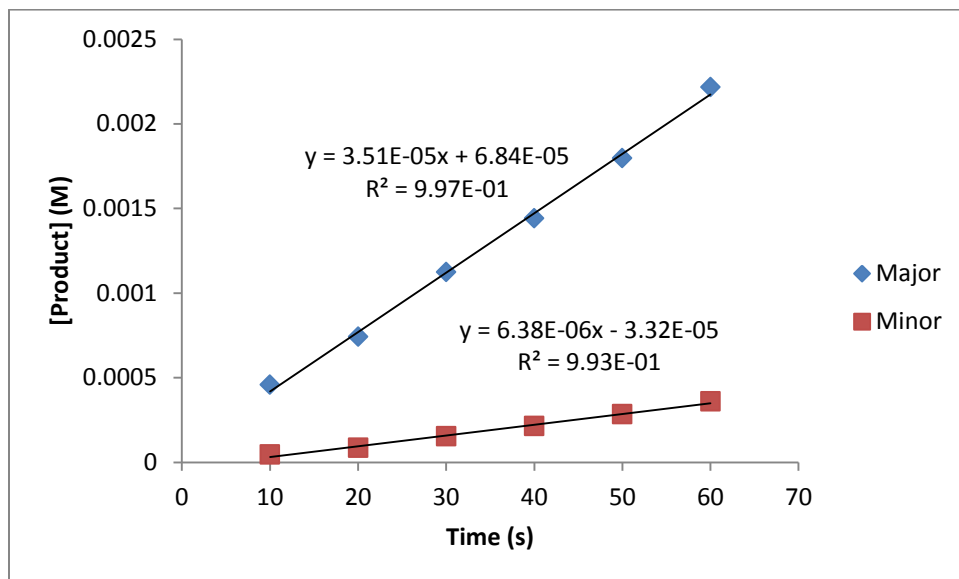

1. H. A. Malik, G. J. Sormunen, J. Montgomery, *J. Am. Chem. Soc.* **2010**, *132*, 6304–6305

Table 4, Entry 2 (E)-((1-(4-fluorophenyl)-2-phenylbut-2-en-1-yl)oxy)triisopropylsilane

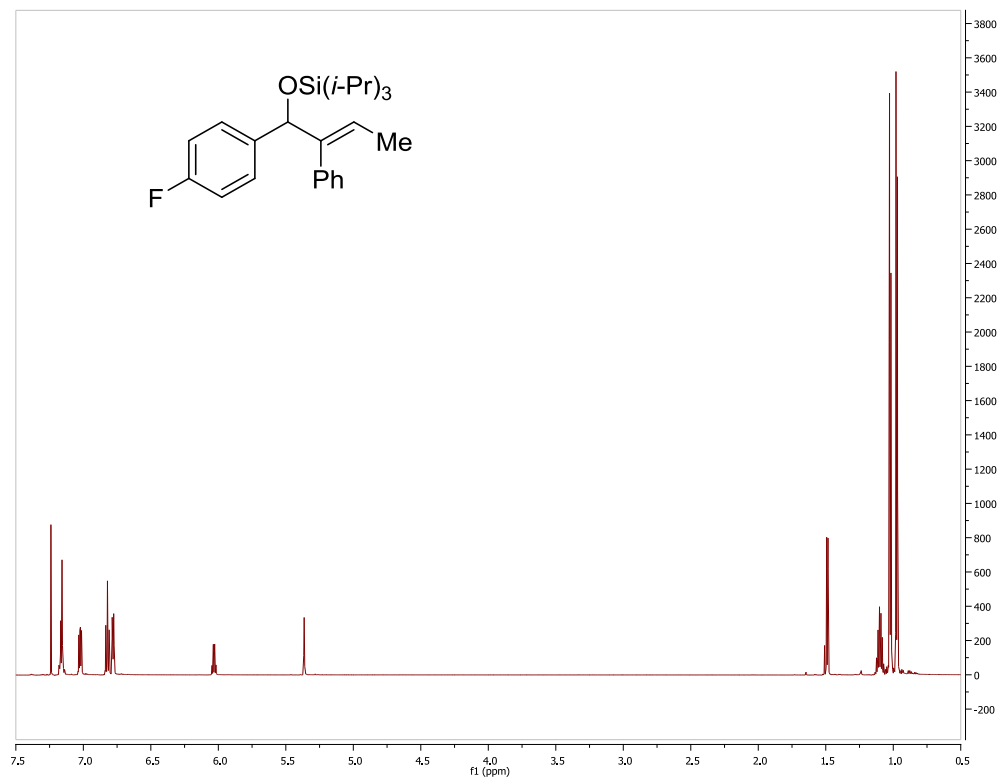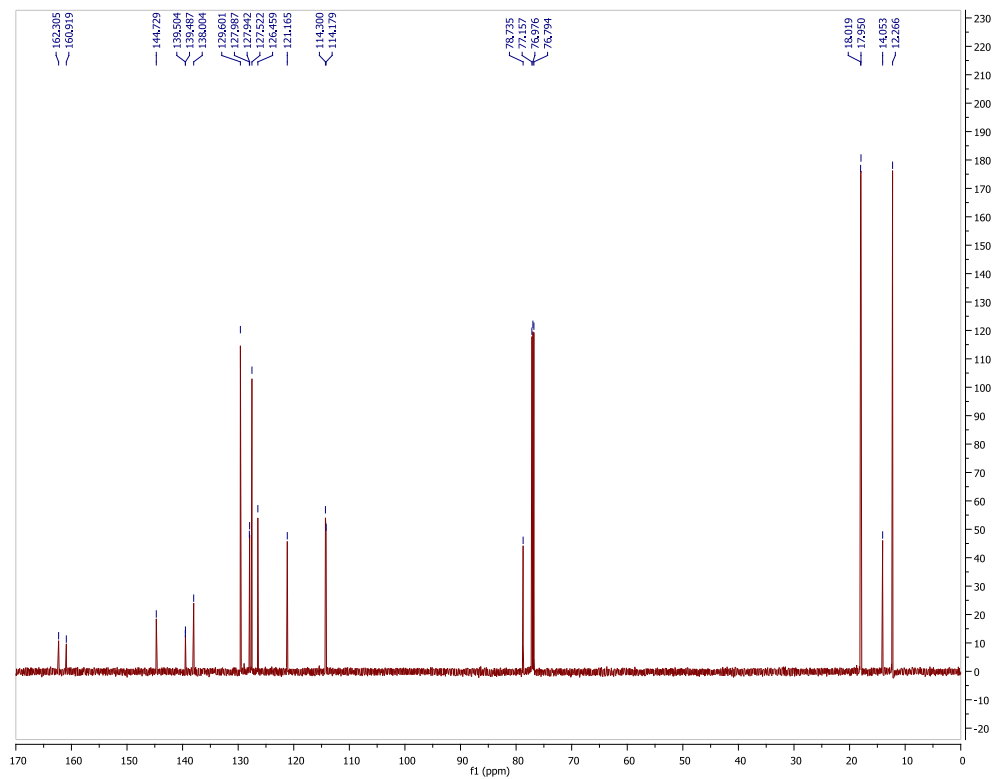

Table 4, Entry 3 (E)-triisopropyl((3-phenylundec-2-en-4-yl)oxy)silane

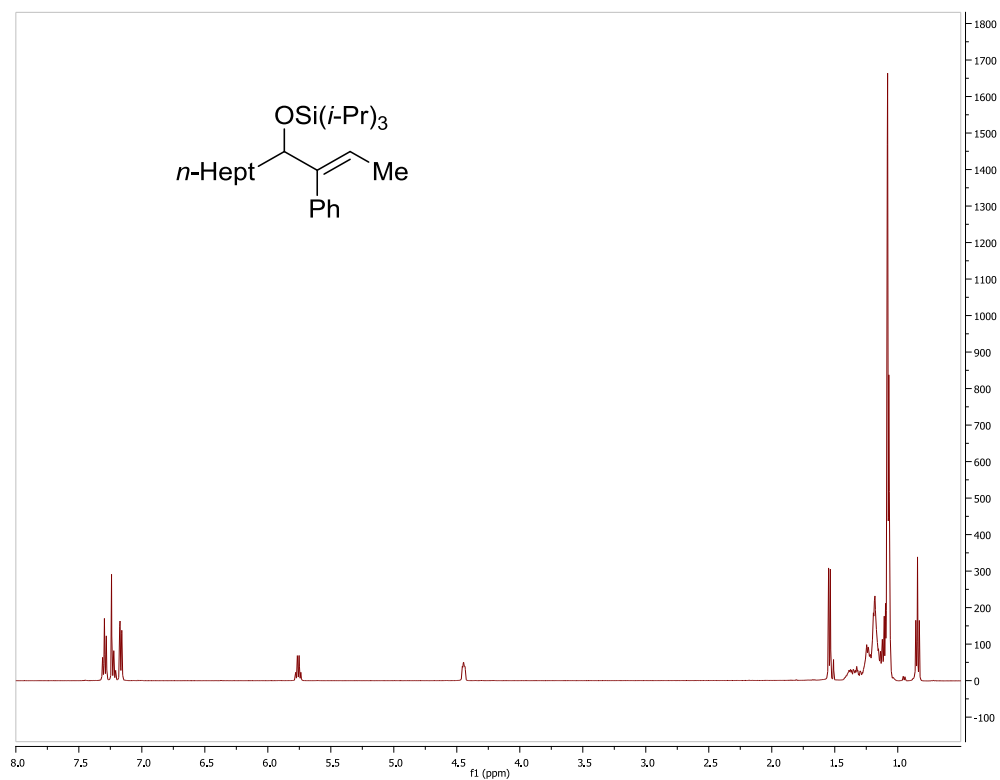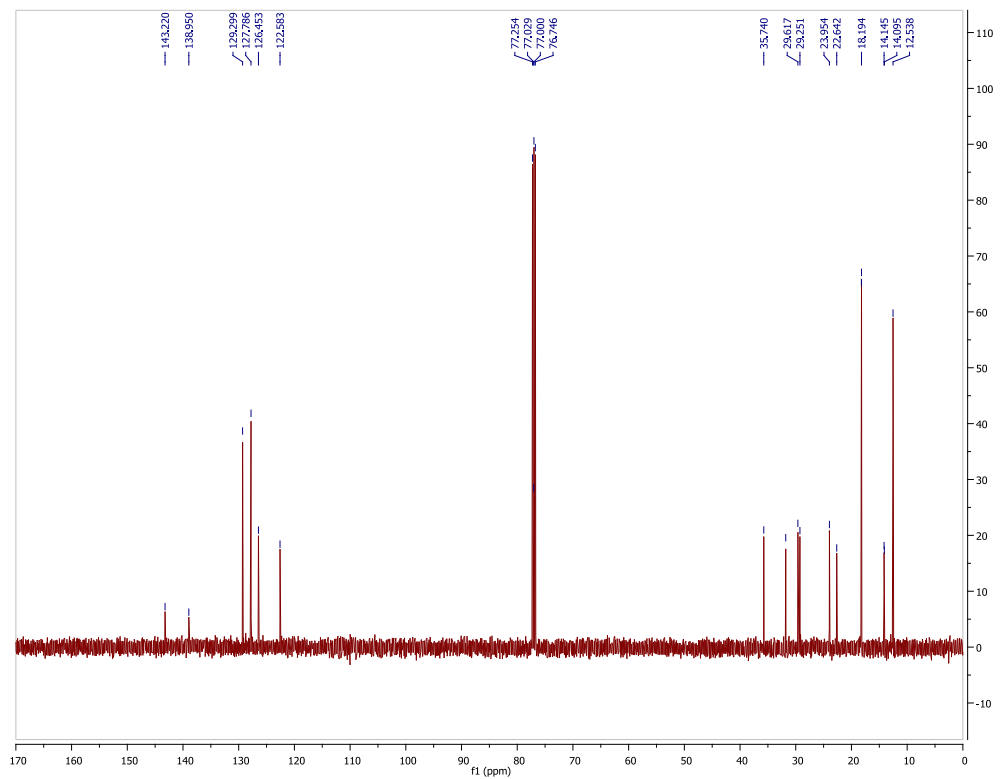

Table 4, Entry 4 (E)-((1-cyclohexyl-2-phenylbut-2-en-1-yl)oxy)triisopropylsilane

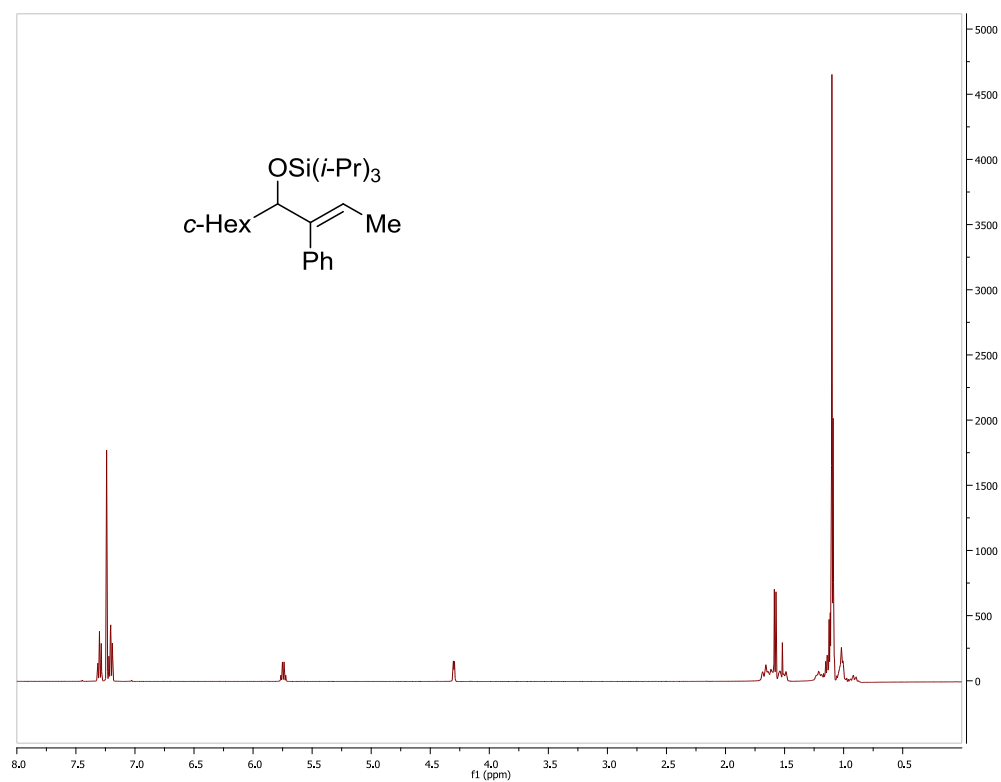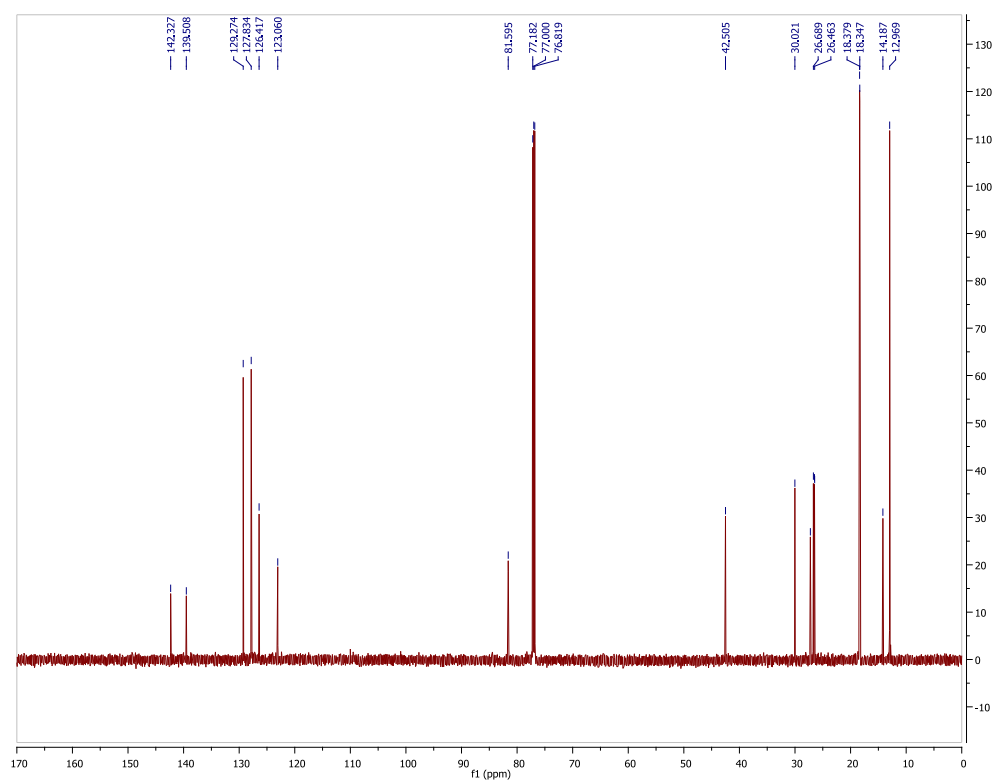



Table 4, Entry 5

Major isomer (E)-((2-isobutyl-1-phenylpent-2-en-1-yl)oxy)triisopropylsilane

Minor isomer (E)-((2-ethyl-5-methyl-1-phenylhex-2-en-1-yl)oxy)triisopropylsilane

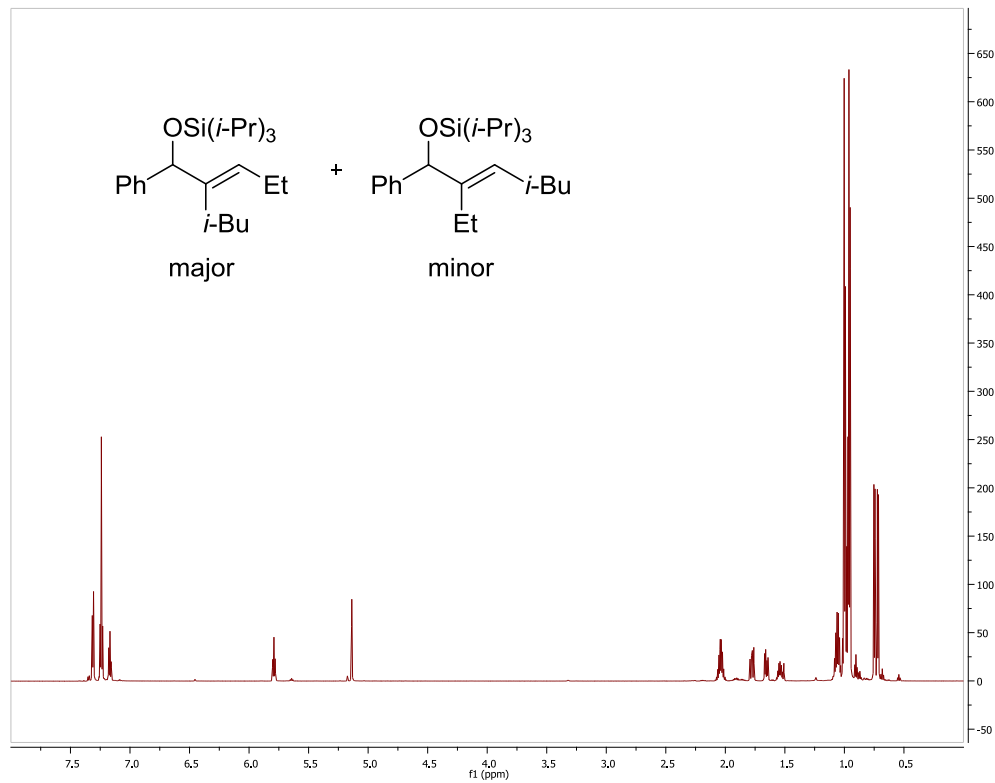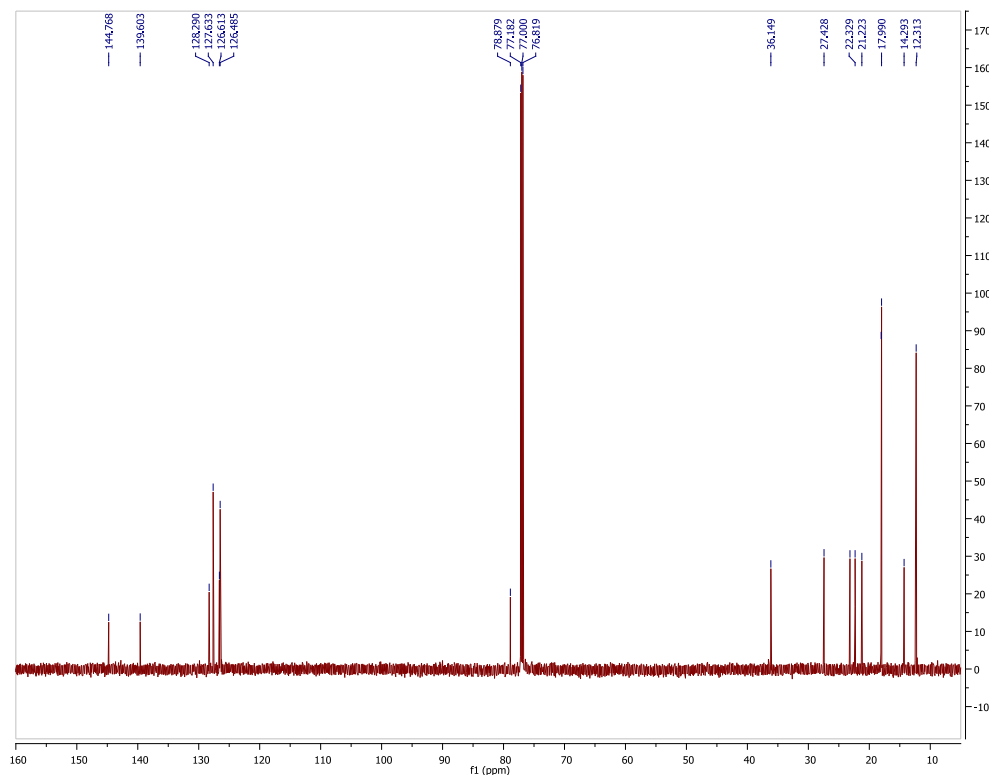

Table 4, Entry 6

Major regioisomer (E)-((4-isobutyldodec-3-en-5-yl)oxy)triisopropylsilane

Minor regioisomer (E)-((5-ethyl-2-methyltridec-4-en-6-yl)oxy)triisopropylsilane

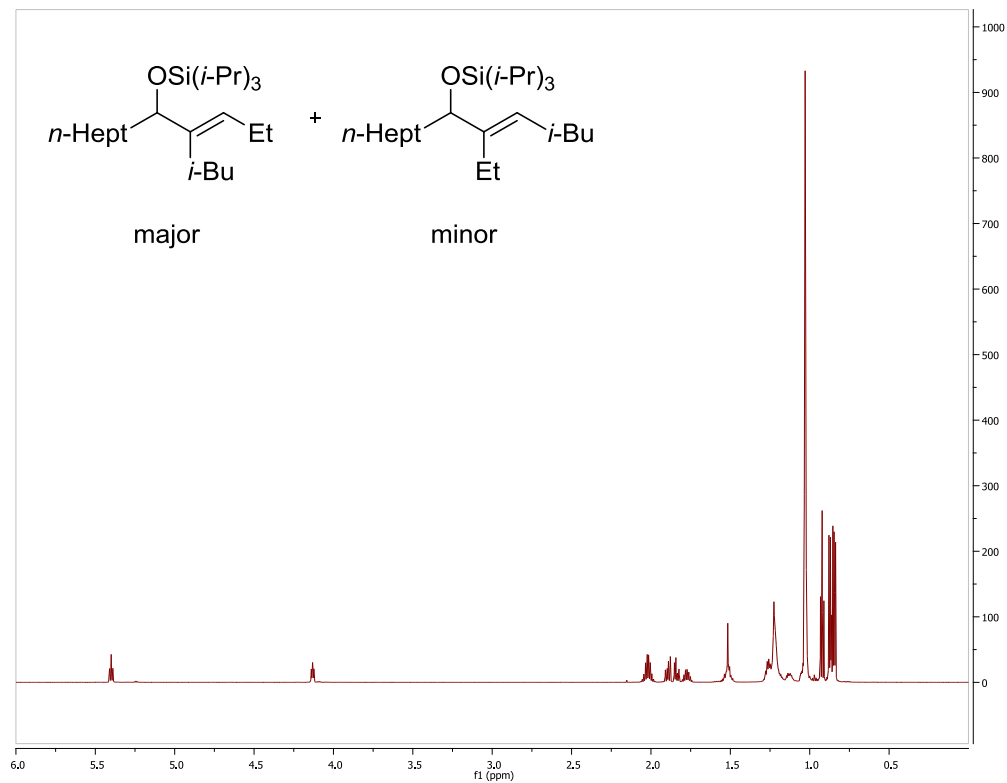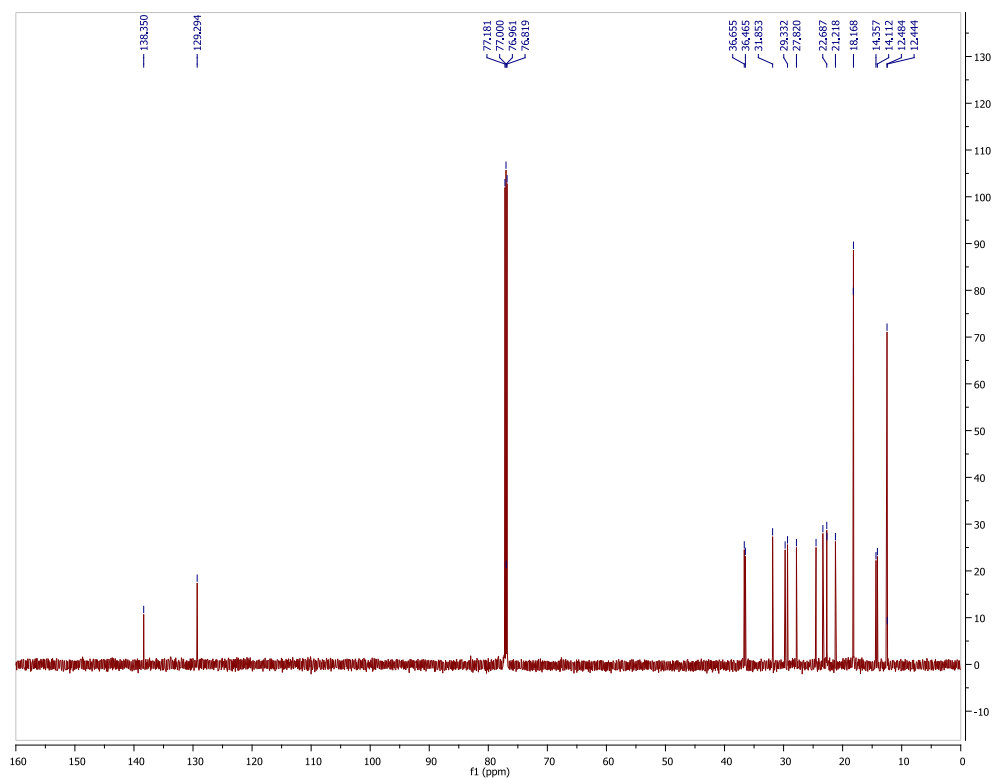

Table 4, Entry 7

Major regioisomer (E)-1-phenyl-2-propylpent-2-en-1-ol

Minor regioisomer (E)-2-ethyl-1-phenylhex-2-en-1-ol

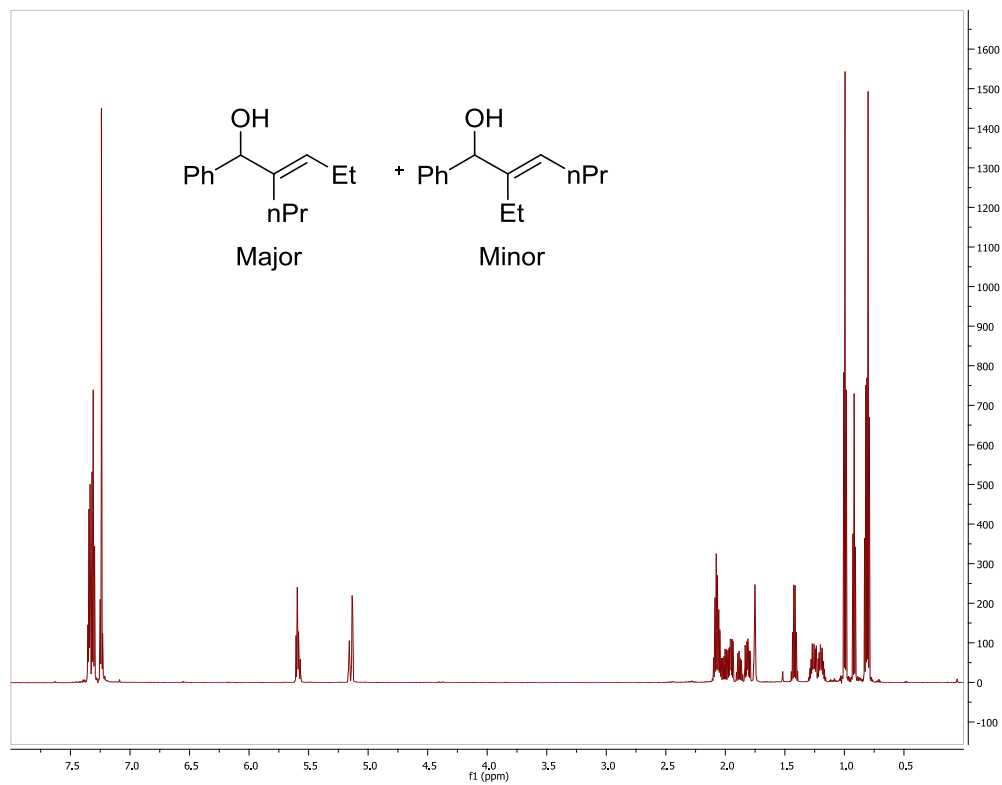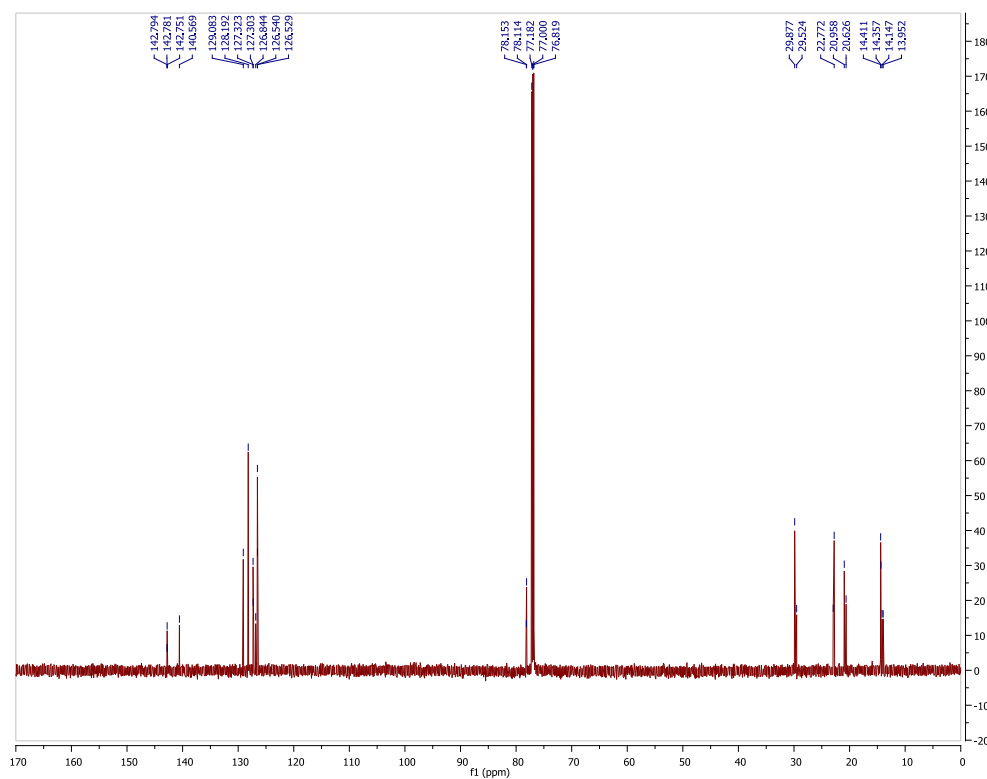

**Table 4, Entry 8**

**Major regioisomer (E)-((2-ethylidene-1-(furan-2-yl)pentyl)oxy)triisopropylsilane**

**Minor regioisomer (E)-((1-(furan-2-yl)-2-methylhex-2-en-1-yl)oxy)triisopropylsilane**

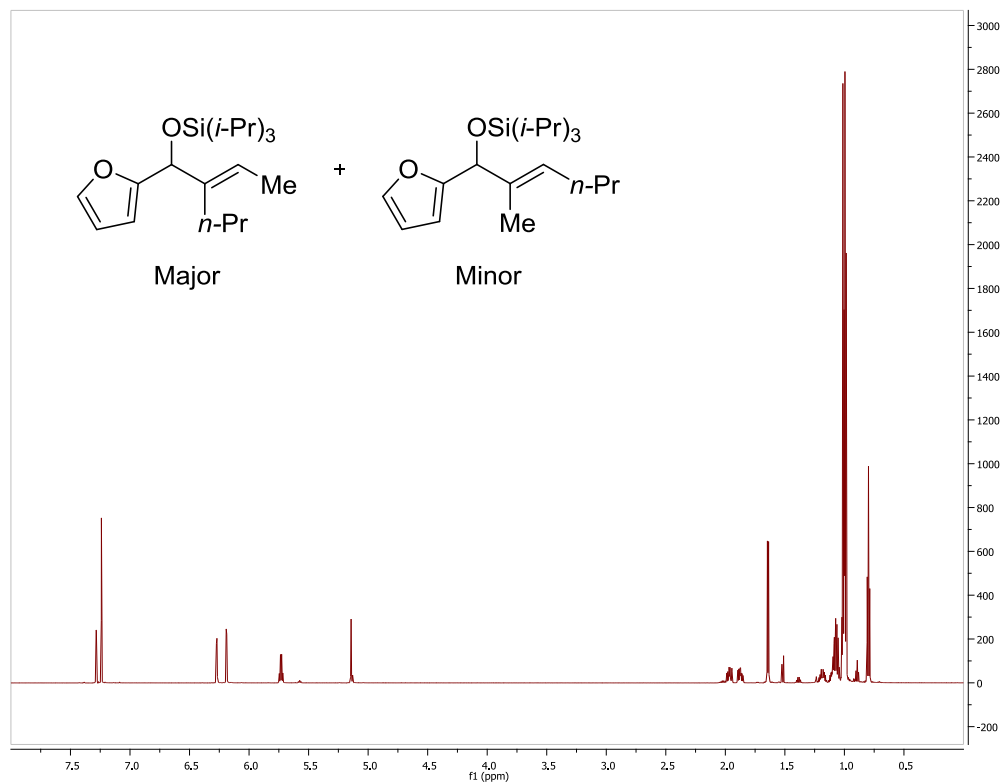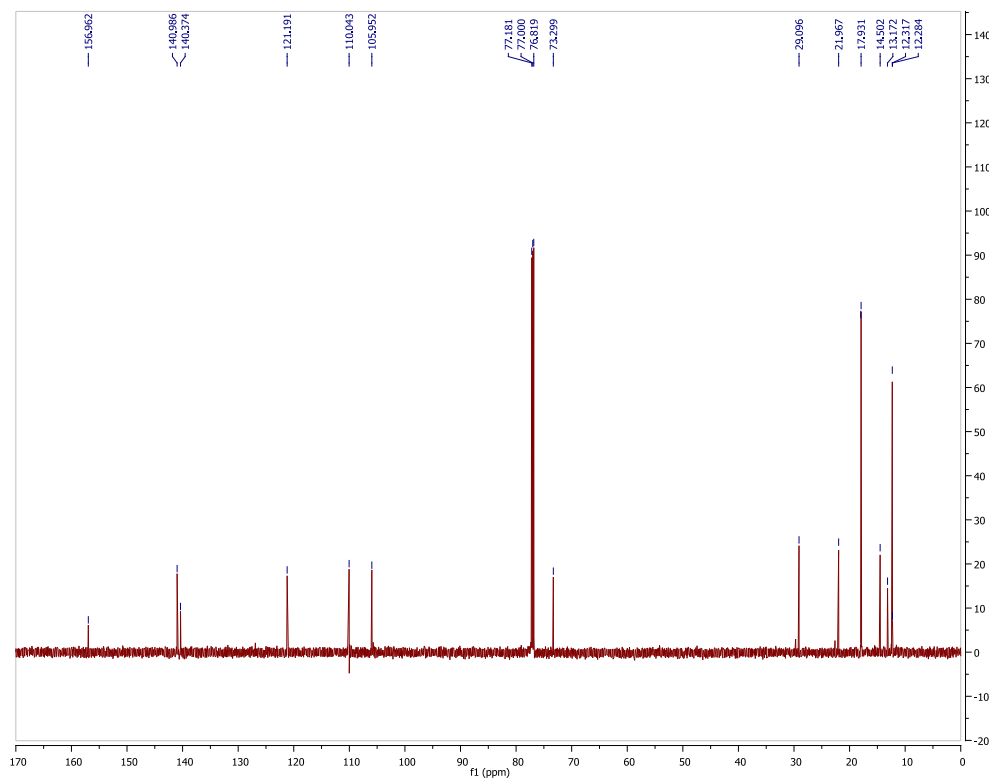

Table 4, Entry 10 (E)-((1-cyclohexyl-2-isopropylbut-2-en-1-yl)oxy)triisopropylsilane

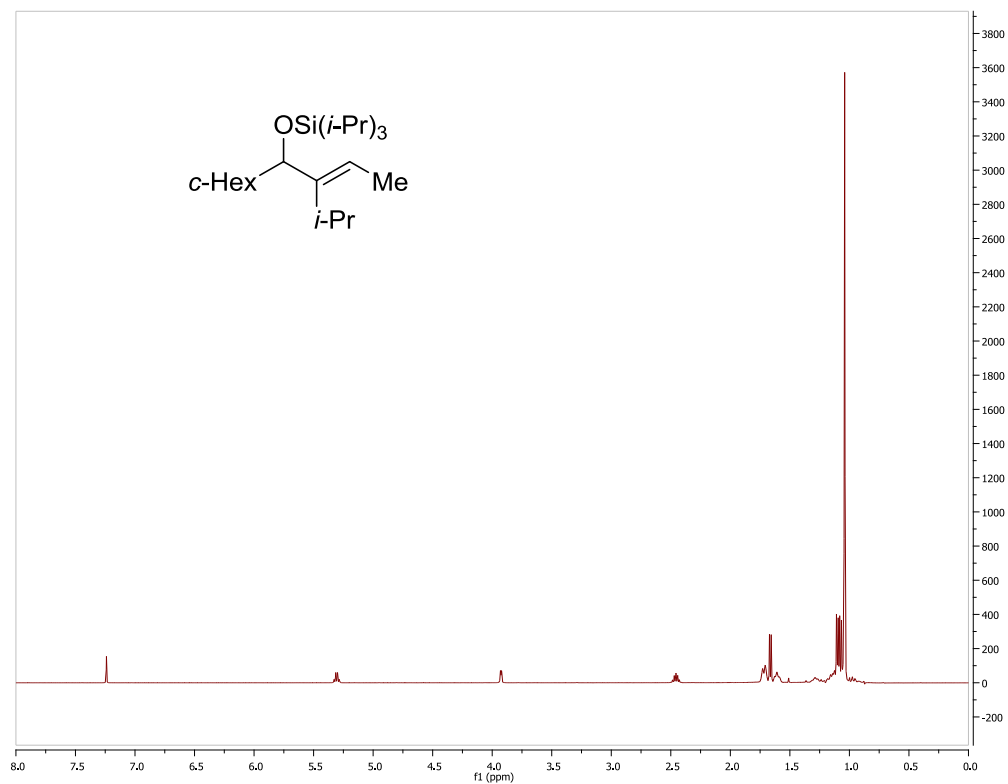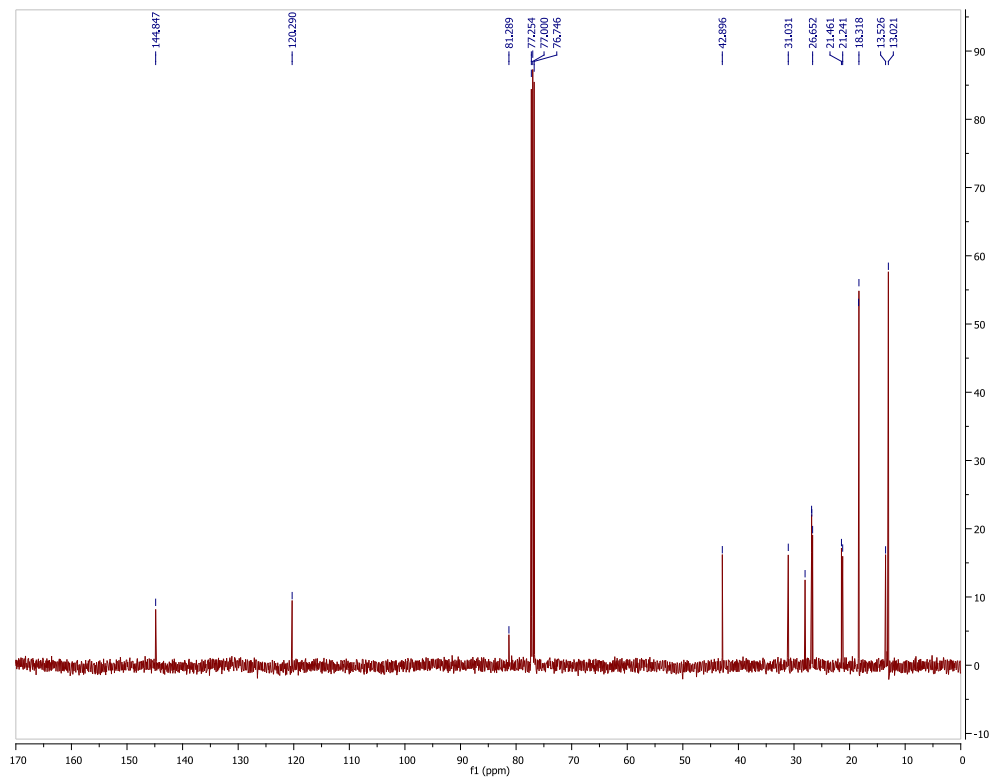

Table 4, Entry 11 Di-tert-butyl(methyl)(3-methyl-2-methylene-1-phenylbutoxy)silane

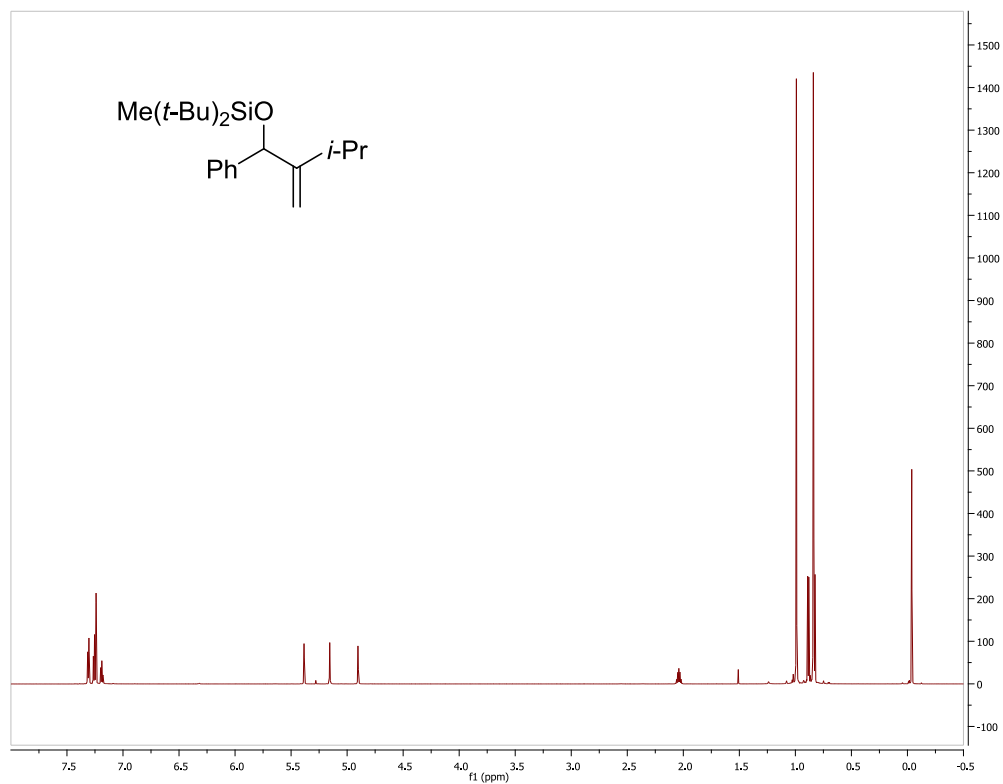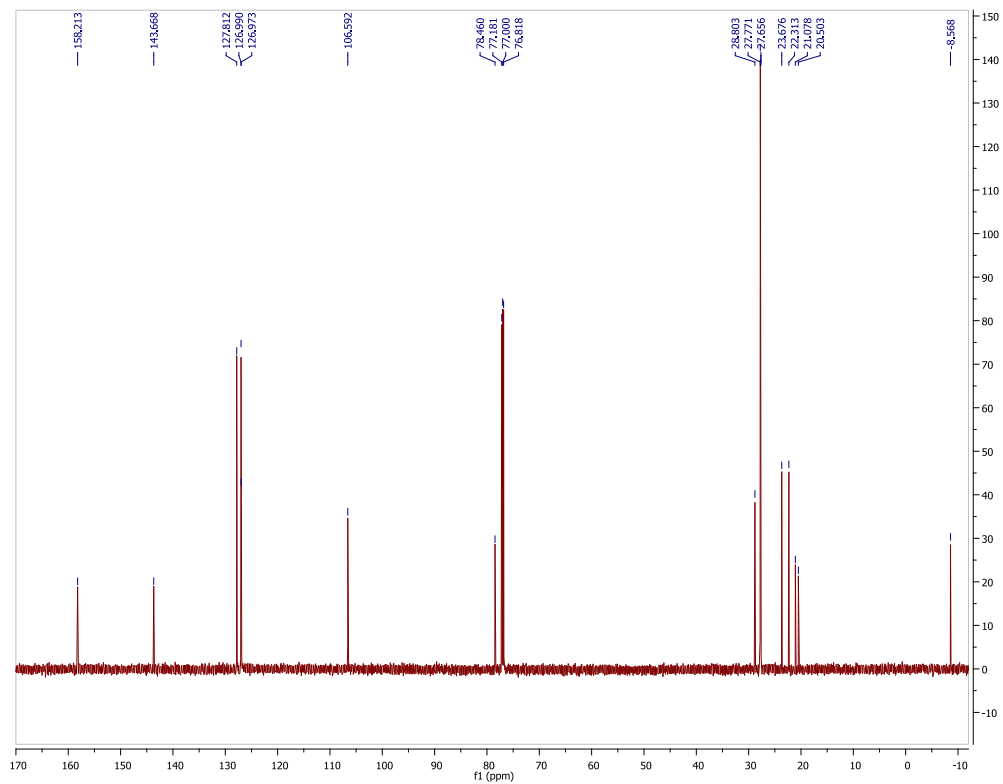

Table 4, Entry 12 Di-tert-butyl(methyl)((2-methylene-1-phenyloctyl)oxy)silane Major regioisomer

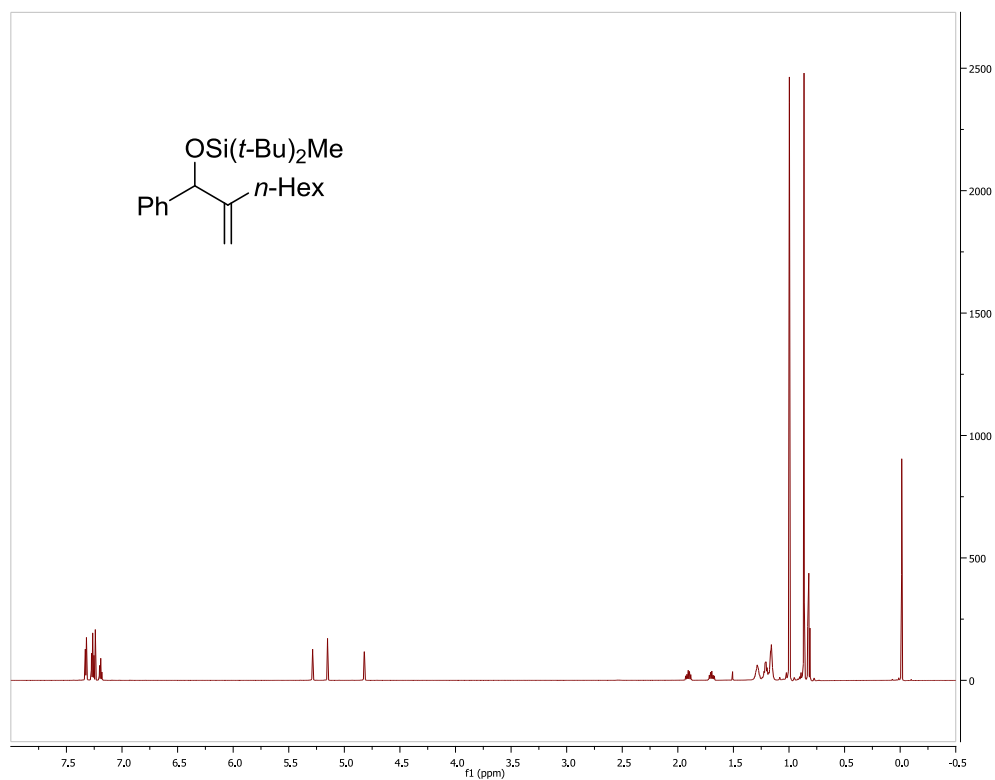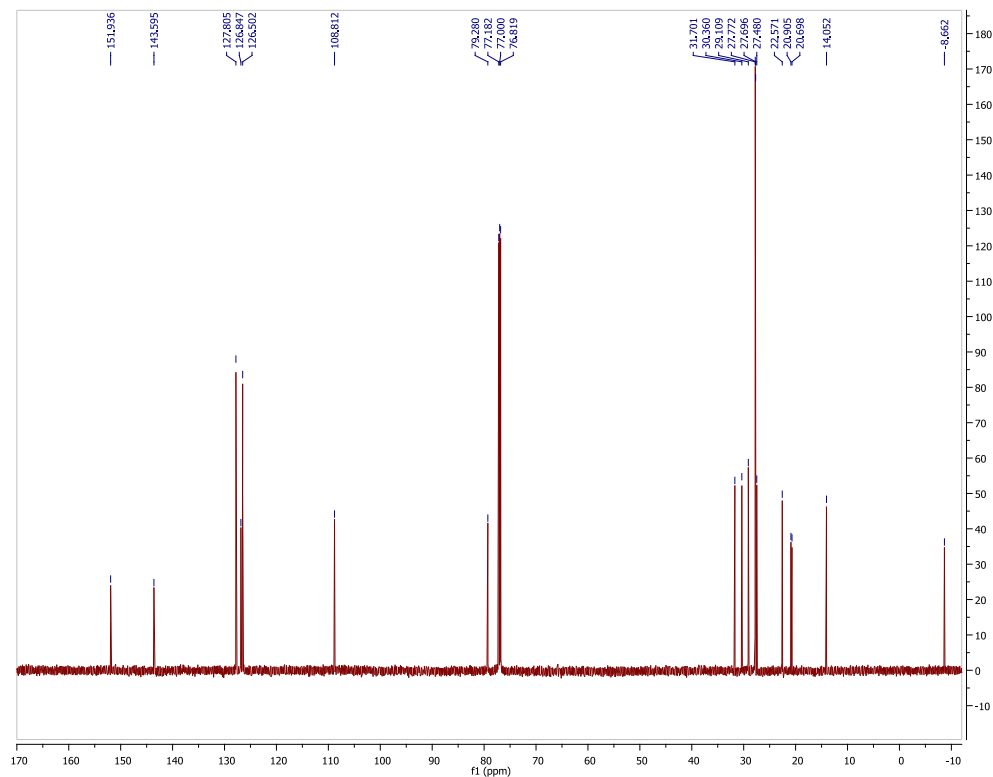

Supplement: ja511778a_si_001.pdf [file ja511778a_si_001.pdf]
